# Supplementary material for: Streptomyces cameroonensis sp. nov., a Geldanamycin Producer That Promotes Theobroma cacao Growth
Source: PubMed Central journal article supplement (PMC5371071; doi:10.1264/jsme2.me16095), 2017-03-04
Supplement: 32_24_s1.pdf [file 32_24_s1.pdf]

## Supplementary material for article

### ***Streptomyces cameroonensis* sp. nov., a geldanamycin producer that promotes *Theobroma cacao* growth**

BY

THADDÉE BOUDJEKO<sup>1,2,3\*</sup>, ROMARIC ARMEL MOUAFO TCHINDA<sup>1,3</sup>, MINA ZITOUNI<sup>3</sup>, JOËLLE AIMÉE VERA TCHATCHOU NANA<sup>1</sup>, SYLVAIN LERAT<sup>3</sup> and CAROLE BEAULIEU<sup>3</sup>

<sup>1</sup>*Laboratory of Phytoprotection and Valorization of Plants Resources, Biotechnology Centre - Nkolbisson; P.O. BOX 3851, Messa, Yaoundé, Cameroon*

<sup>2</sup>*Department of Biochemistry, Faculty of Science, University of Yaoundé I, P.O. Box 812 Yaoundé, Cameroon*

<sup>3</sup>*Centre SÈVE, Département de Biologie, Université de Sherbrooke, Sherbrooke, Quebec J1K 2R1, Canada*

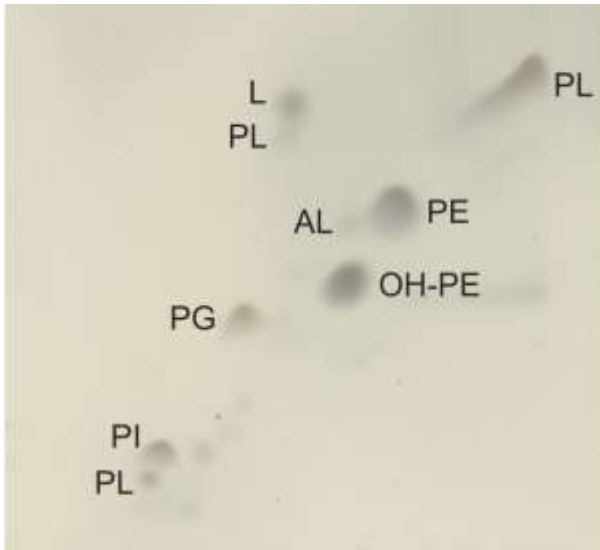

L: lipid  
AL: aminolipid  
PL: phospholipid  
PG: phosphatidylglycerol  
PI: phosphatidylinositol  
PE: phosphatidylethanolamine  
OH-PE: hydroxy-phosphatidylethanolamine

**Supplementary Figure S1.** Polar lipids produced by strain JJY4<sup>T</sup> grown in ISP-2 medium.

**Supplementary Table S1.** Cellular fatty acids composition of strain JJY4<sup>T</sup>.

| Fatty acid name                  | Percent (%) |
|----------------------------------|-------------|
| 13:0 iso                         | 0.30        |
| 14:0 iso                         | 2.83        |
| 14:0                             | 0.71        |
| 15:0 iso                         | 9.68        |
| 15:0 anteiso                     | 17.55       |
| 15:1 $\omega$ 6c                 | 0.41        |
| 15:0                             | 1.83        |
| 16:1 iso H                       | 1.48        |
| 16:0 iso                         | 22.54       |
| 16:1 $\omega$ 7c/15:0 iso<br>2OH | 4.89        |
| 16:0                             | 10.23       |
| iso 17:1 $\omega$ 9c             | 2.69        |
| anteiso 17:1 $\omega$ 9c         | 1.96        |
| 17:0 iso                         | 5.20        |
| 17:0 anteiso                     | 13.13       |
| 17:1 $\omega$ 8c                 | 0.67        |
| 17:0 cyclo                       | 2.02        |
| 18:0                             | 1.13        |
| 18:0 iso                         | 0.47        |
| 18:1 $\omega$ 7c                 | 0.27        |

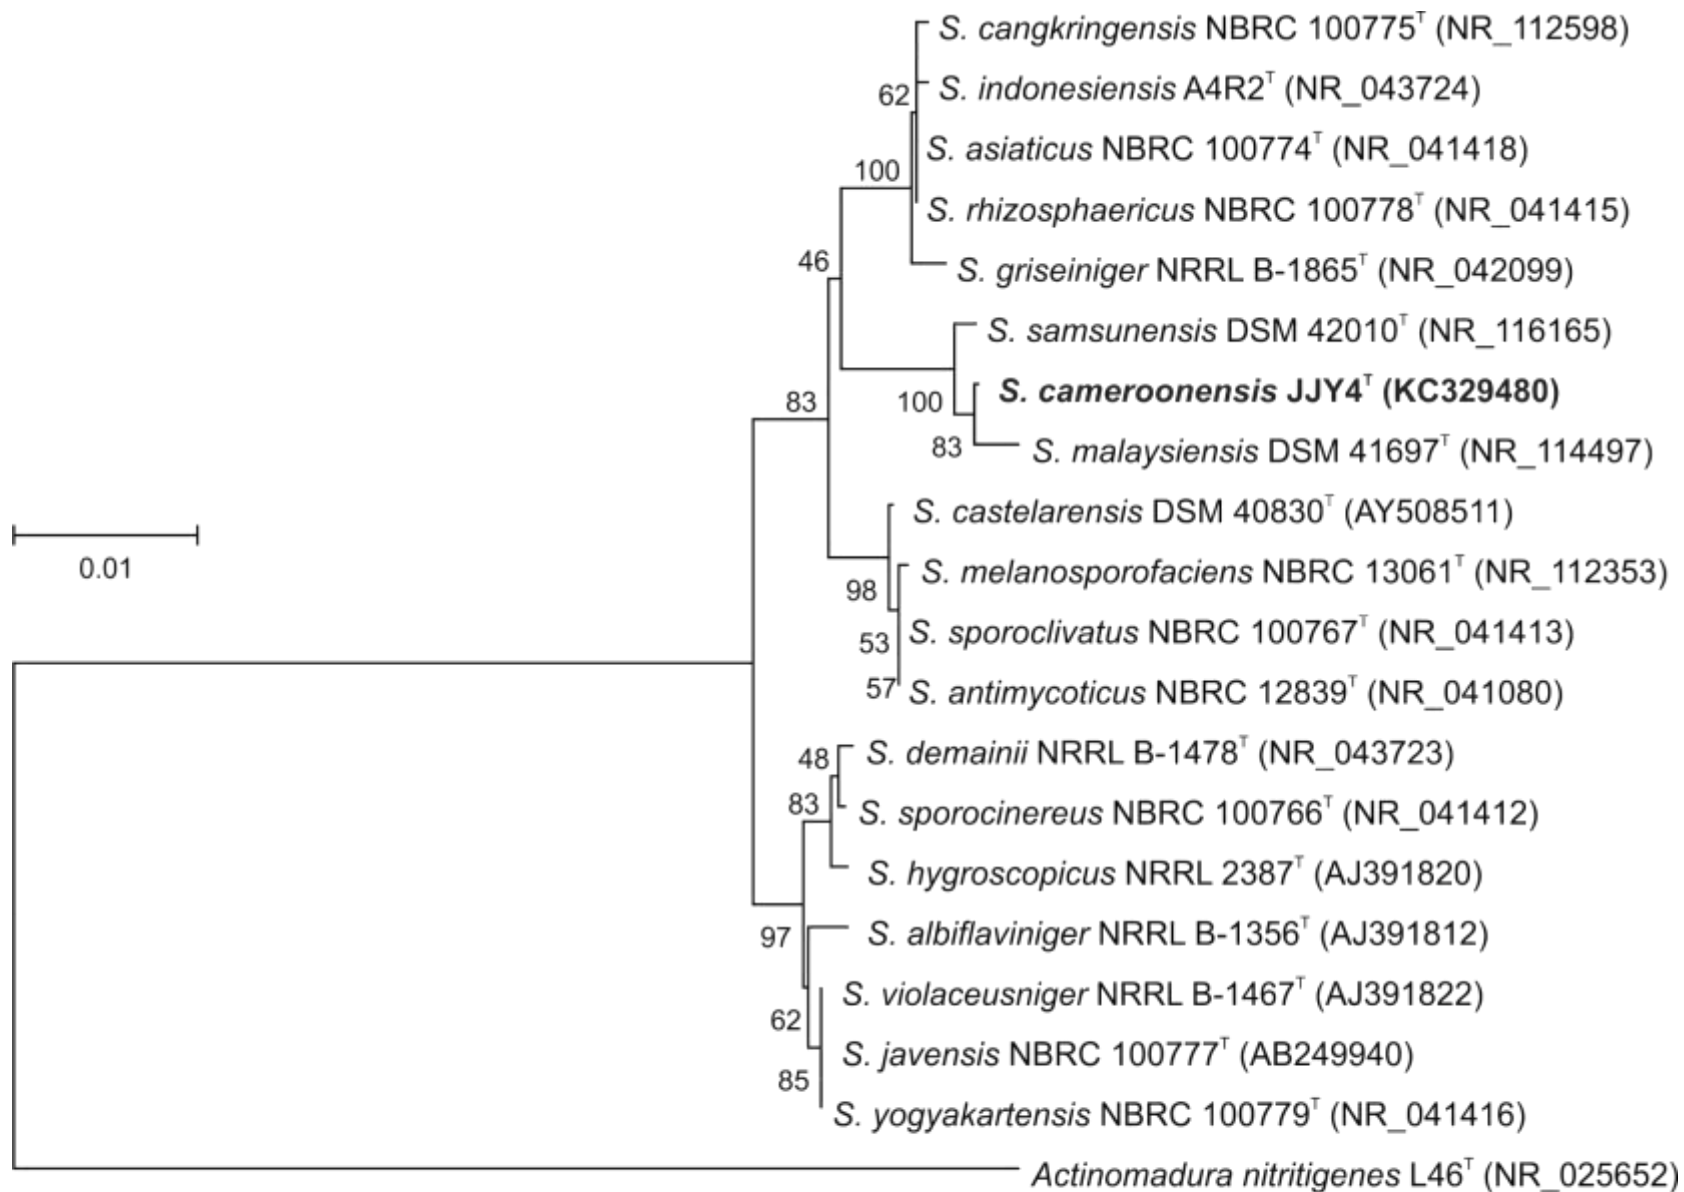

**Supplementary Figure S2.** Position of strain JY4<sup>T</sup> on the *S. violaceusniger* gene tree determined by the neighbor-joining method. The bar represents a distance of 0.01 substitutions per nucleotide.
